# Supplementary material for: Characterization of HIV-1 Infection in Microglia-Containing Human Cerebral Organoids
Source: MDPI journal article supplement (doi:10.3390/v14040829), 2022-04-16
Supplement: s1 [file s1]

# Supplementary table 2

Supplementary Table 2: Primer sequences used for qRT-PCR experiments

| Gene        | 5' forward 3'          | 5' reverse 3'           |
|-------------|------------------------|-------------------------|
| CSF1R       | ATCAGCATCCGGCTGAAAGT   | CTCGAATCCGCACCAGCTCT    |
| TREM2       | TCAGGAAGGTCCTGGTGGA    | GGGTGGGAAGGGGATTTCTC    |
| AIF1        | AGACGTTACGCTACCCTGACTT | GGCCTGTTGGCTTTTCTTTTCTC |
| CX3CR1      | CTTACGATGGCACCCAGTGA   | CAAGGCAGTCCAGGAGAGTT    |
| TMEM119     | CTTCCTGGATGGGATAGTGGAC | GCACAGACGATGAACATCAGC   |
| P2RY12      | TTTGTGTGTCAAGTTACCTCCG | CTGGTGGTCTTCTGGTAGCG    |
| GFAP        | AGGTCCATGTGGAGCTTGAC   | GCCATTGCCTCATACTGCGT    |
| ALDH1L1     | GGATGCCTTTGAGAATGGACGG | TCCTGGTGCTGCTCCATGAGAT  |
| CD4         | TCCAGAGGCTTAATCACACCG  | GGCTAGGCTTGAAGGAAAAGG   |
| CXCR4       | ACTGTTGTCTGAACCCCATCC  | AGAGGTGAGTGCGTGCTGG     |
| Map2        | CTCAGCACCGCTAACAGAGG   | CATTGGCGCTTCGGACAAG     |
| NEUN/RBFOX3 | TTACGGAGCGGTCGTGTATC   | CGGGCTGAGCGTATCTGTAG    |
| TBR2/EOMES  | CGGCCTCTGTGGCTCAAAT    | TAGTGGGCAGTGGGATTGAGT   |
| CCR5        | TTATACATCGGAGCCCTGCC   | ATCAGGATGAGGATGACCAGC   |
| ACTB        | GCTCCTCCTGAGCGCAAG     | CATCTGCTGGAAGGTGGACA    |
