# Supplementary material for: Characterization of HIV-1 Infection in Microglia-Containing Human Cerebral Organoids
Source: MDPI journal article supplement (doi:10.3390/v14040829), 2022-04-16
Supplement: s1 [file s1]

# Supplementary table 1

**Supplementary Table 1:** Antibodies used in this study for immunofluorescence

| Antigen/Target | Host species | Dilutions | Provider, article number  |
|----------------|--------------|-----------|---------------------------|
| IBA1           | Goat         | 1:1000    | Abcam, AB5076             |
| GFAP-pan       | Rabbit       | 1:1000    | Dako, Z0334               |
| MAP 2          | Rabbit       | 1:1000    | Abcam, AB32454            |
| GFP            | Chicken      | 1:1000    | Abcam, AB13970            |
| Chicken, 488   | Donkey       | 1:1000    | Sigma-Aldrich, SAB4600031 |
| Goat, 568      | Donkey       | 1:1000    | Sigma-Aldrich, SAB4600074 |
| Rabbit, 568    | Donkey       | 1:1000    | Sigma-Aldrich, SAB4600076 |
