# Supplementary figures and images for: Characterization of HIV-1 Infection in Microglia-Containing Human Cerebral Organoids
Source: MDPI journal article supplement (doi:10.3390/v14040829), 2022-04-16

# Supplementary Figure S1

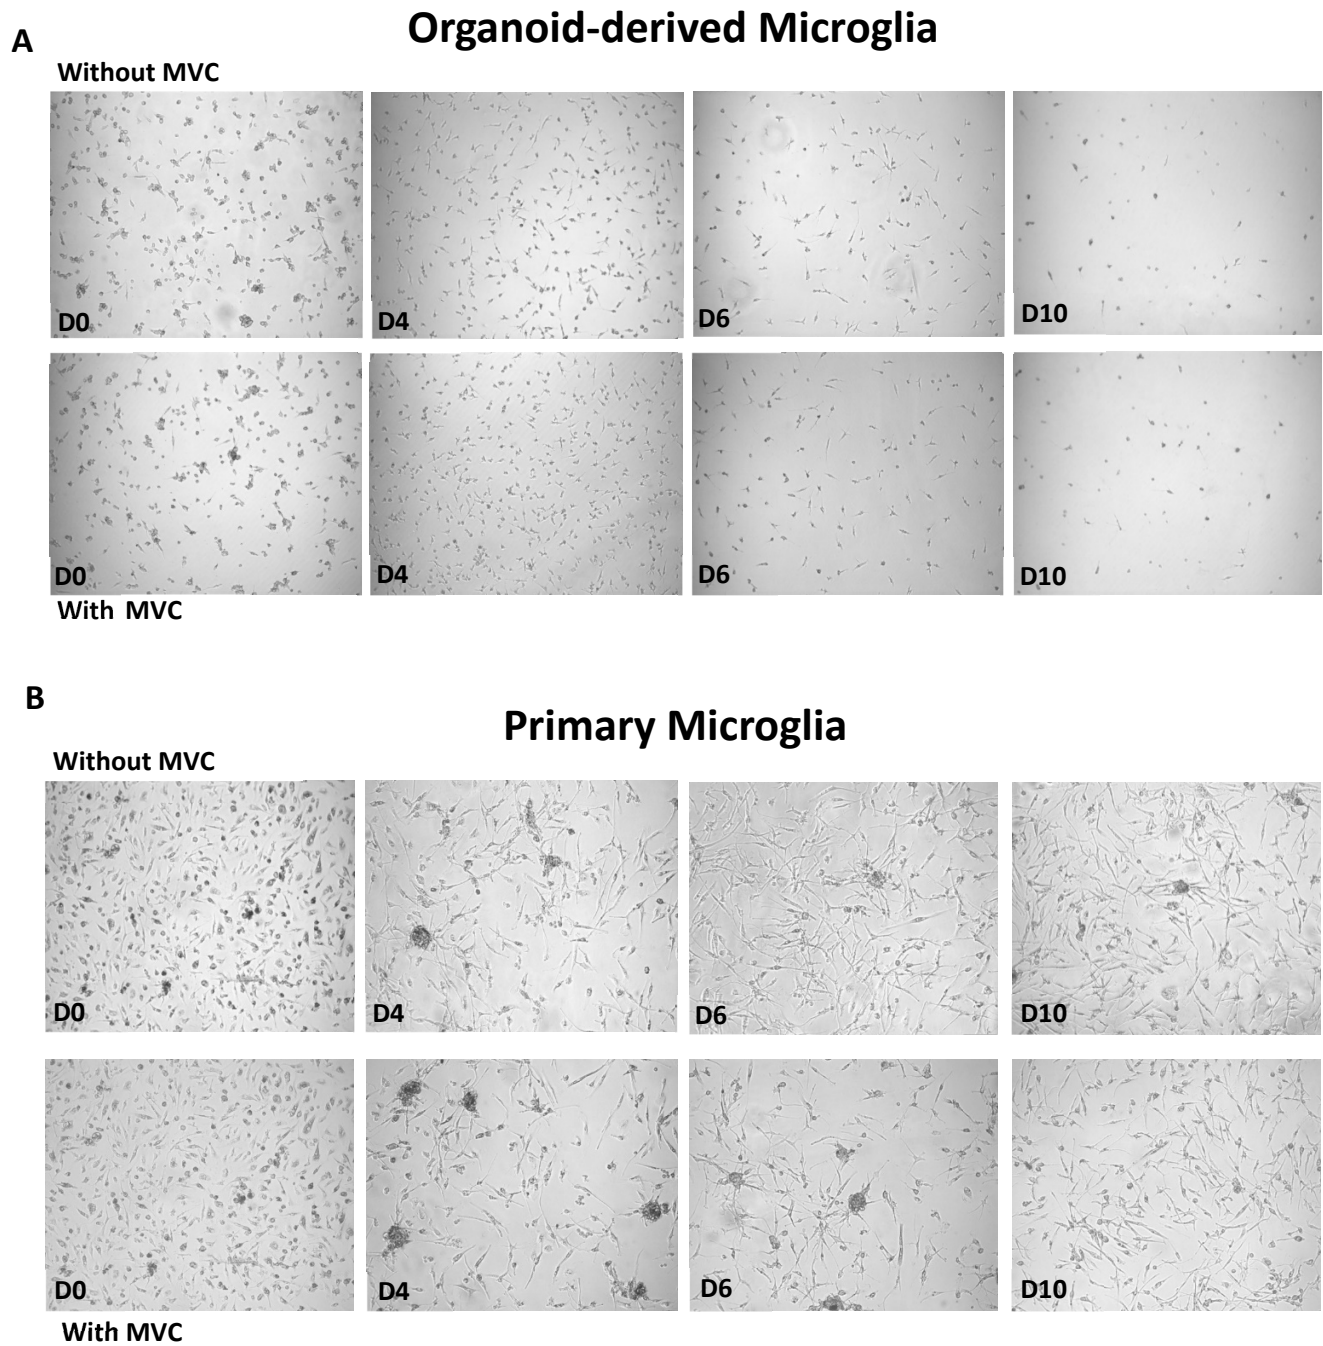

Supplement: s1 [file s1]

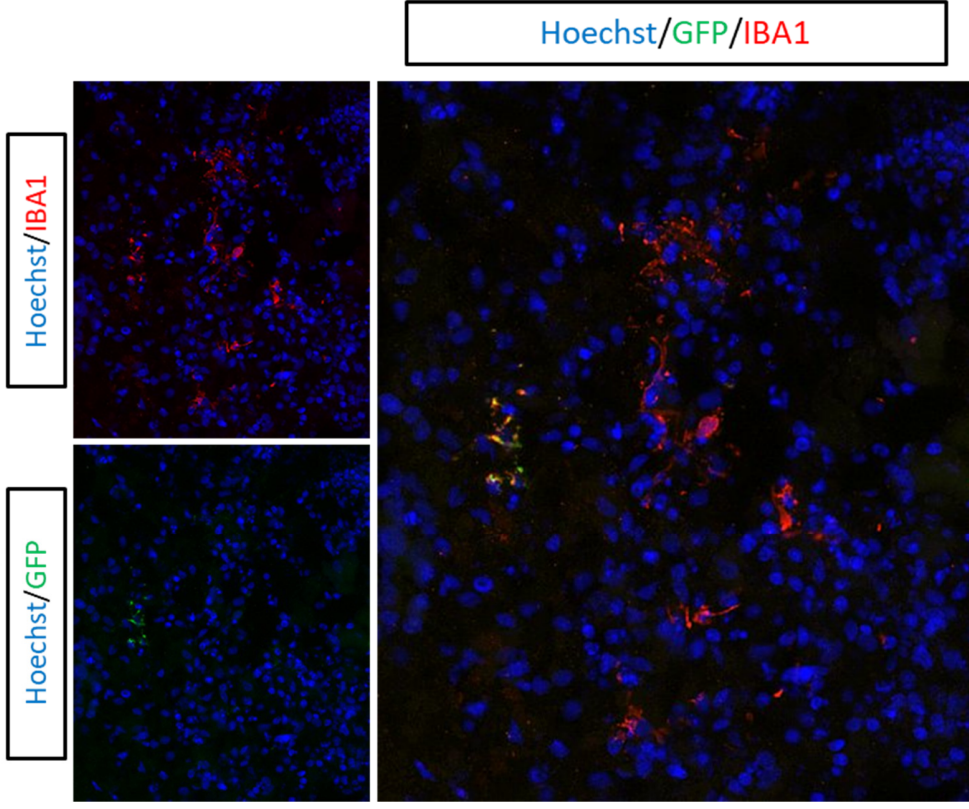

Supplement: s1 [file s1]

# Supplementary Figure S2

Primary microglia

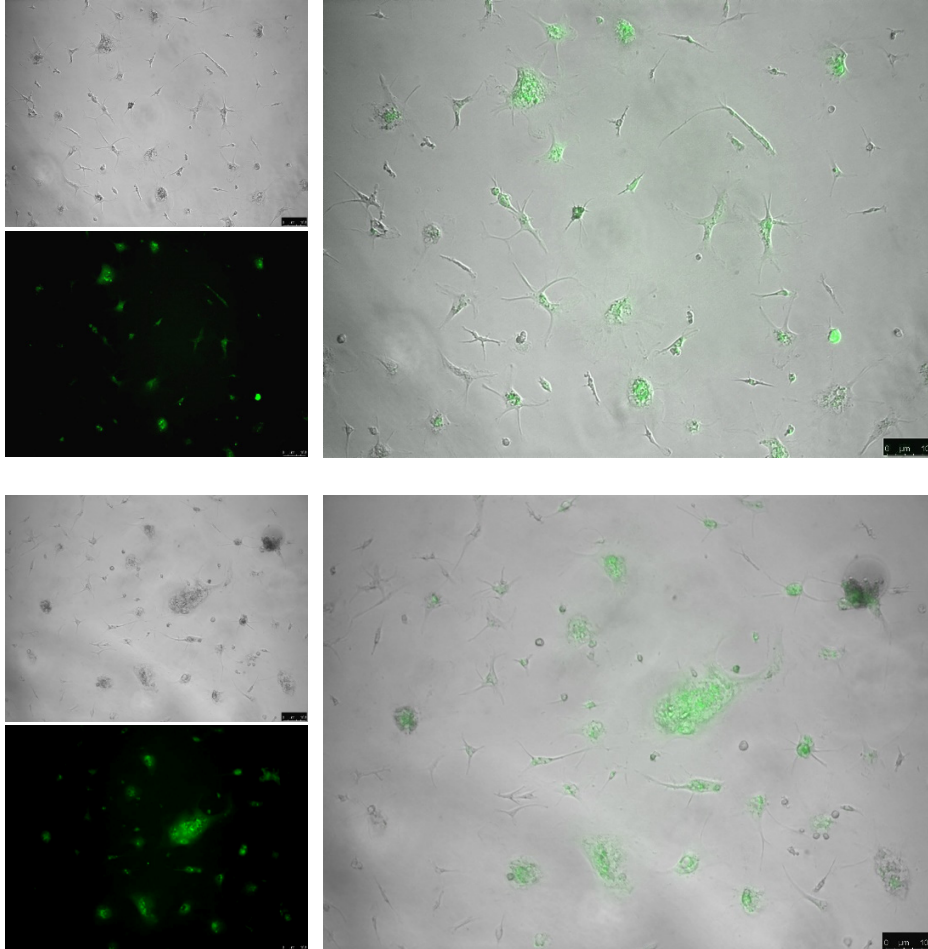

Supplement: s1 [file s1]

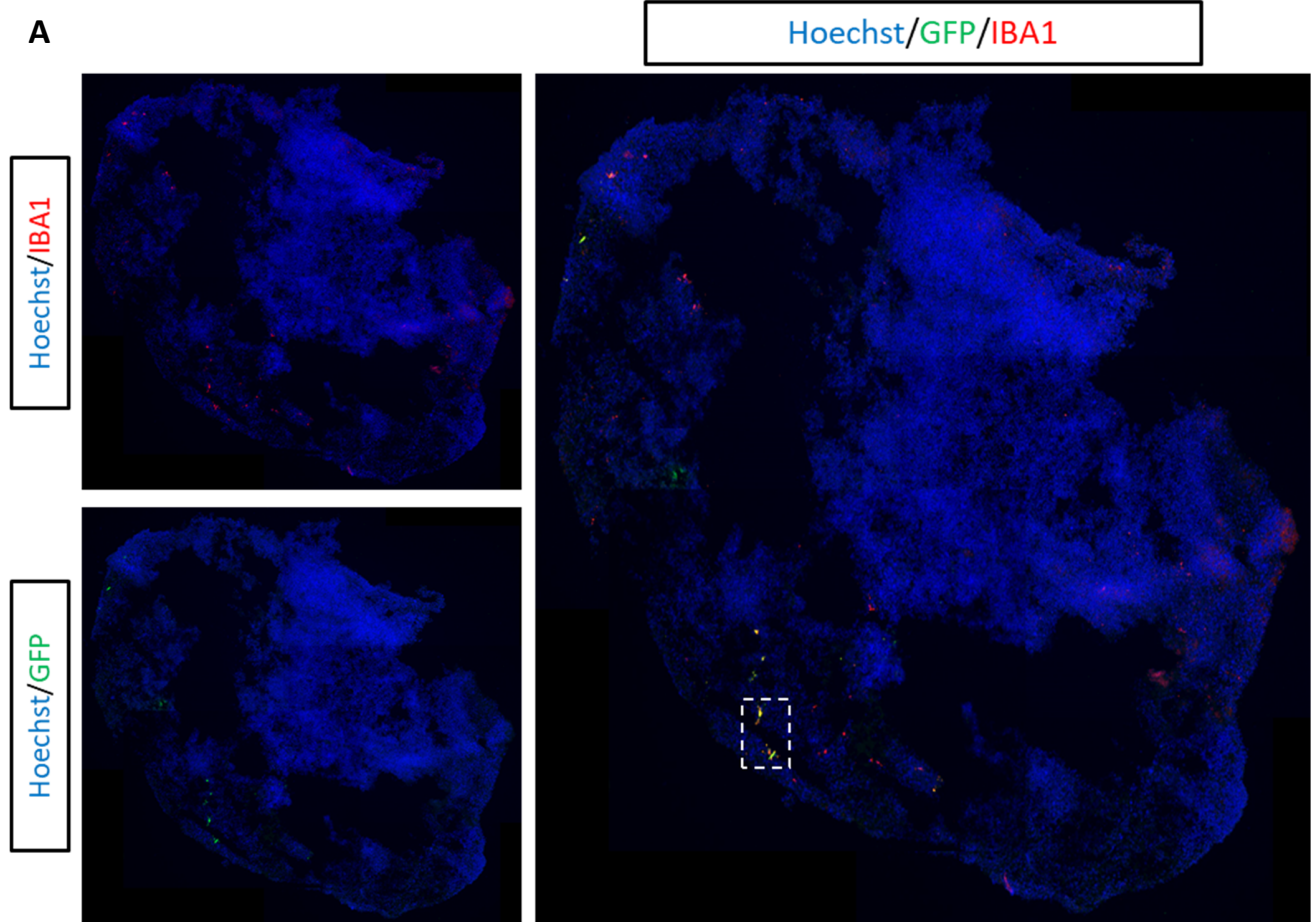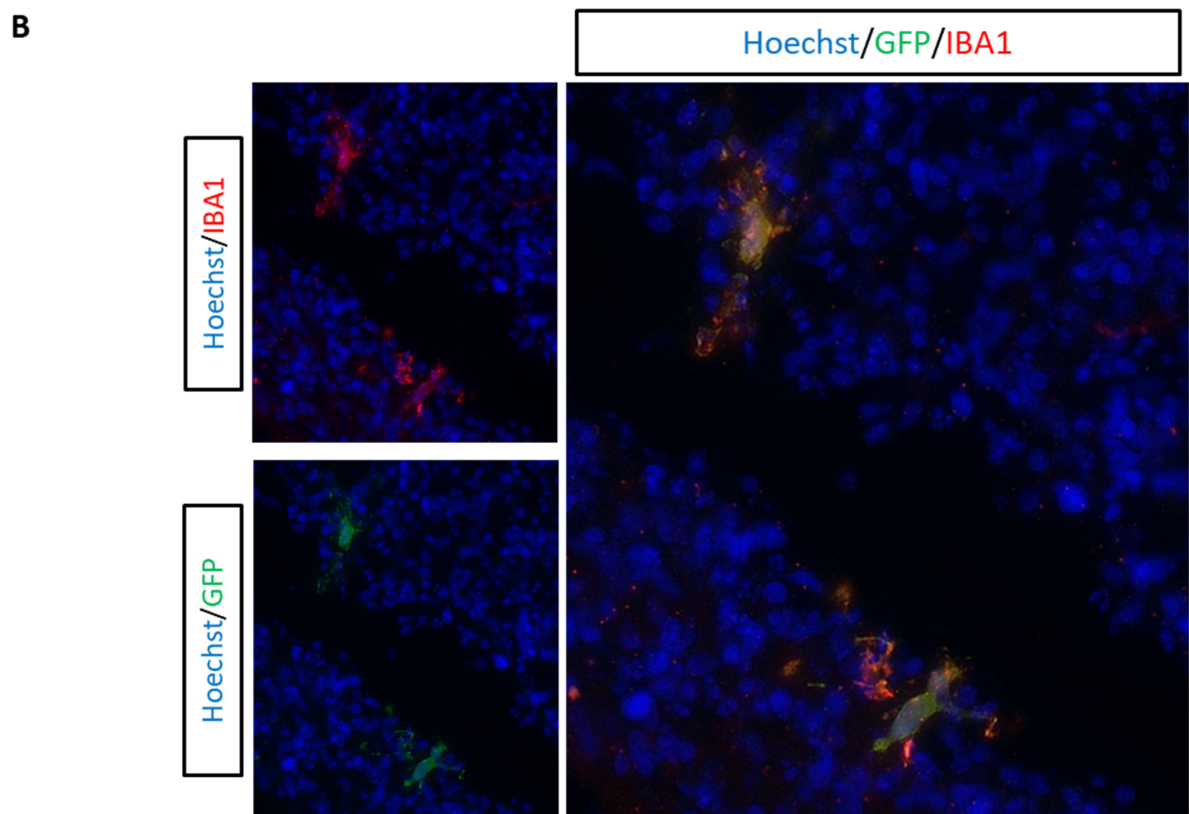

Supplement: s1 [file s1]
